# Lower *ADD1* Gene Promoter DNA Methylation Increases the Risk of Essential Hypertension

Li-Na Zhang<sup>1\*</sup>, Pan-Pan Liu<sup>1\*</sup>, Lingyan Wang<sup>2\*</sup>, Fang Yuan<sup>1</sup>, Leiting Xu<sup>1</sup>, Yanfei Xin<sup>3</sup>, Li-Juan Fei<sup>1</sup>, Qi-Long Zhong<sup>1</sup>, Yi Huang<sup>1</sup>, Limin Xu<sup>1</sup>, Ling-Mei Hao<sup>4</sup>, Xu-Jun Qiu<sup>4</sup>, Yanping Le<sup>1</sup>, Meng Ye<sup>5\*</sup>, Shiwei Duan<sup>1\*</sup>

**1** Zhejiang Provincial Key Laboratory of Pathophysiology, School of Medicine, Ningbo University, Ningbo, Zhejiang, China, **2** Bank of Blood Products, Ningbo No. 2 Hospital, Ningbo, Zhejiang, China, **3** State Key Laboratory of Safety Evaluation for New Drugs, Zhejiang Academy of Medical Sciences, Hangzhou, Zhejiang, China, **4** Clinical laboratory, The Seventh Hospital of Ningbo, Ningbo, Zhejiang, China, **5** The Affiliated Hospital, Ningbo University, Ningbo, Zhejiang, China

## Abstract

The goal of our study is to investigate the contribution of promoter DNA methylation of  $\alpha$ -adducin (*ADD1*) gene to the risk of essential hypertension (EH). Using the bisulphite pyrosequencing technology, DNA methylation levels of five CpG dinucleotides on *ADD1* promoter were measured among 33 EH cases and 28 healthy controls. Significantly higher *ADD1* DNA methylation levels were observed in the females than in the males (CpG1:  $P=0.016$ ; CpG2-5:  $P=0.021$ ). A breakdown analysis by gender showed that lower CpG1 methylation was associated with an increased risk of EH in females (adjusted  $P=0.042$ ). A much more significant association between lower CpG2-5 methylation levels and the increased risk of EH was found in males (adjusted  $P=0.008$ ). CpG1 methylation was inversely correlated with age in females ( $r=-0.407$ ,  $P=0.019$ ) but not in males. *ADD1* CpG1 and CpG2-5 methylation levels were significantly lower in post-menopausal ( $>50$  years) women than pre-menopausal ( $\leq 50$  years) women (CpG1:  $P=0.006$ ; CpG2-5:  $P=0.034$ ). A significant interaction between CpG1 methylation and age was found in females (CpG1\*age:  $P=0.029$ ). CpG2-5 methylation was shown as a significant predictor of EH in males [area under curve (AUC)=0.855,  $P=0.001$ ], in contrast that CpG1 methylation was a trend toward indicator in females (AUC=0.699,  $P=0.054$ ). In addition, significant differences were observed between males and females for alanine aminotransferase (ALT,  $P=0.001$ ), aspartate aminotransferase (AST,  $P=0.005$ ) and uric acid ( $P<0.001$ ). The concentration of AST was inversely correlated with *ADD1* CpG2-5 methylation levels in female controls ( $r=-0.644$ ,  $P=0.024$ ). These observations may bring new hints to elaborate the pathogenesis of EH.

**Citation:** Zhang L-N, Liu P-P, Wang L, Yuan F, Xu L, et al. (2013) Lower *ADD1* Gene Promoter DNA Methylation Increases the Risk of Essential Hypertension. PLoS ONE 8(5): e63455. doi:10.1371/journal.pone.0063455

**Editor:** Degui Zhi, University of Alabama at Birmingham, United States of America

**Received:** January 5, 2013; **Accepted:** April 2, 2013; **Published:** May 15, 2013

**Copyright:** © 2013 Zhang et al. This is an open-access article distributed under the terms of the Creative Commons Attribution License, which permits unrestricted use, distribution, and reproduction in any medium, provided the original author and source are credited.

**Funding:** The research was supported by the grants from National Natural Science Foundation of China (31100919), Zhejiang Provincial Natural Science Foundation of China under Grant No.R13H020004, K.C. Wong Magna Fund in Ningbo University, Natural Science Foundation of Ningbo City (2011A610037), Ningbo social development research projects (2012C50032), and Key Program of Education Commission of Zhejiang Province (Z201017918). The funders had no role in study design, data collection and analysis, decision to publish, or preparation of the manuscript.

**Competing Interests:** The authors have declared that no competing interests exist.

\* E-mail: duanshiwei@nbu.edu.cn (SD); zhanglina@nbu.edu.cn (LZ); dryemeng@yahoo.com.cn (MY)

† These authors contributed equally to this work.

## Introduction

Essential hypertension (EH) is one of the most important causes of premature death worldwide. EH is a complex disorder resulting from both genetic and environmental factors [1,2]. Approximately 20–60% of the blood pressure variability in general population is heritable [3]. Epidemiological studies have documented environmental factors such as physical inactivity, obesity, high sodium and low potassium diet, and alcohol consumption are associated with hypertension risk [4,5]. Disorders in the metabolism of high-density lipoprotein cholesterol (HDL-C) and triglycerides (TG) play a key role in EH progression [6,7].

A sexual dimorphism exists in the developmental origins of EH [8,9]. Males are reported to be more susceptible to hypertension than females [10]. Gender difference in the risk of hypertension was observed to be associated with altered expression of hormone receptors such as renal  $\alpha$ 2-adrenergic receptors [11] and angiotensin receptors [12]. In addition, evidence has shown a gender dimorphism in the expression of renin [13,14] and urinary angiotensinogen excretion [15] which are important risk factors

for EH. The sexual dimorphism in mammalian gene expression have been observed to be linked to the gender differences in the amounts of sex hormones [16] (e.g., estrogens, androgens).

*ADD1* gene encodes one of adducin subunits ( $\alpha$ -adducin) [17]. Adducin modulates the surface expression of multiple transporters and ion pumps, and thus regulates cellular signal transduction and cytolemma ion transport [18]. Human and animal model studies have found that *ADD1* gene is a candidate gene for EH [18,19]. However, epidemiological studies have shown that the contribution of *ADD1* Gly460Trp mutation (rs4961) to hypertension varies among different ethnic groups [20–24]. Meta-analyses were unable to reach a consensus for this mutation [25–28]. Moreover, gender dimorphism of the association between hypertension and *ADD1* Gly460Trp was observed in Caucasians [29].

DNA methylation is a stable epigenetic mark and usually occurs at cytosine residues in the context of cytosine-phosphate-guanine dinucleotide (CpG) in mammalian cells [30]. Promoter DNA methylation is linked to transcriptional silencing of protein-coding genes [31] and thus regulates the function of protein. Aberrant methylation is shown to play important roles in the occurrence and

development of diseases including colorectal cancer [32,33], breast cancer [34,35], coronary artery disease [36] and schizophrenia [37,38]. The evidence of the association between DNA methylation and the risk of EH was scarce. A significant decline in global DNA methylation level is observed in EH patients and the trend continues along with the progression of hypertension [39]. Altered global DNA methylation in pre-eclampsia placentas was shown to be associated with maternal hypertension [40]. Aberrant DNA methylation of *11beta-HSD2* and *Adrb1* genes were found to be associated with EH [41] and the outcome of medications [42], respectively.

We hypothesize that *ADD1* promoter DNA methylation contributes to EH. Our goal is to study whether promoter DNA methylation of *ADD1* gene is associated with EH, and to explore the interaction of promoter DNA methylation with gender and clinical indicators of lipid and amino acid metabolism.

## Materials and Methods

### Sample Collection

This study comprised 33 cases (14 males,  $50.1 \pm 4.9$  years; 19 females,  $51.3 \pm 4.7$  years) and 28 controls (14 males,  $51.3 \pm 6.3$  years; 14 females,  $47.9 \pm 5.0$  years) collected from the community residents in Zhenhai district of Ningbo city in Zhejiang province, China. All individuals are Han Chinese living in Ningbo city for at least three generations. Hypertensive patients were defined according to the golden standard [43]. All hypertensives have received antihypertensive medications for more than three months or have at least three consecutive records of systolic blood pressure (SBP)  $>140$  mmHg and/or diastolic blood pressure (DBP)  $>90$  mmHg (European Society of Hypertension-European Society of Cardiology Guidelines, 2003). Patients had SBP  $<120$  mmHg and DBP  $<80$  mmHg and had no family history of hypertension in the first degree relatives were recruited as controls. None of the controls has received antihypertensive therapy. The gender and age of controls were well matched with EH cases. All the individuals don't have a history of diabetes mellitus, secondary hypertension, myocardial infarction, stroke, renal failure, drug abuse and other serious diseases. A calibrated mercury sphygmomanometer with appropriate adult cuff size was applied to measure blood pressures according to a standard protocol recommended by the American Heart Association [44]. Blood pressures were measured in supine position by two trained observers at an interval of at least 10 minutes. Blood samples were collected in 3.2% citrate sodium-treated tubes and then stored at  $-80^{\circ}\text{C}$  for DNA extraction. The study protocol was approved by the ethical committee of Ningbo University. The informed written consent was obtained from all subjects.

### Phenotypes Collection

Blood samples were obtained after a 12 h overnight fast from the antecubital vein using vacutainer tubes containing EDTA. Plasma levels of cholesterol, TG, ALT, AST, uric acid and glucose concentrations were enzymatically measured using CX7 biochemistry analyzer (Beckman, Fullerton, CA).

### DNA Methylation Assay

Human genomic DNA was prepared from peripheral blood samples using the nucleic acid extraction automatic analyzer (Lab-Aid 820, Xiamen City, China). DNA was quantified using the PicoGreen® double strand DNA (dsDNA) Quantification Kit (Molecular Probes, Inc. Eugene, USA). Bisulphite pyrosequencing technology was used to determine the 5 CpG dinucleotides methylation levels on the fragment within *ADD1* promoter

(Figure 1). Pyrosequencing assays combine sodium bisulfite DNA conversion chemistry (EpiTect Bisulfite Kits; Qiagen; #59104), polymerase chain reaction (PCR) amplification (Pyromark PCR Kit; Qiagen; #978703) and sequencing by synthesis assay (Pyromark Gold Q24 Reagents; Qiagen; #978802) of the target sequence. Sodium bisulfite preferentially deaminates unmethylated cytosine residues to thymines (after PCR amplification), whereas methyl-cytosines remain unmodified. PCR primers were selected using PyroMark Assay Design software v2.0.1.15. The PCR and pyrosequencing primers for *ADD1* gene promoter amplification were described in Table S1.

### Statistical Analysis

Statistical analyses were performed to investigate the association among *ADD1* DNA methylation, metabolic profile and EH. Either Pearson chi-square or Fisher exact test was used for the association of EH with categorical variables including gender, smoking, and drinking. Two sample *t*-test was applied for the association of EH with continuous variables including age, body mass index (BMI), total cholesterol, total triglycerides, glucose, ALT, AST, and uric acid. Pearson correlation was used to determine the association between the *ADD1* DNA methylation and metabolic characteristics. Receiver operating characteristic (ROC) curve was used to analyze the sensitivity of *ADD1* DNA methylation in EH diagnosis. Logistic regression was implemented for the interaction of *ADD1* methylation and age. A two-sided *p*-value  $<0.05$  was considered statistically significant. All the above statistical analyses were performed with PASW Statistics 18.0 software (SPSS, Inc., Somers, NY, USA). Meanwhile, Power and Sample Size Calculation software (v3.0.43) was used to estimate the power of the study [45].

## Results

A total of 33 cases and 28 age- and gender-matched controls were recruited in the current association study. As shown in Table 1, mean levels of body mass index (BMI) and all metabolic phenotypes were within normal ranges. The mean levels of age and BMI were well paired between males and females (Table 1).

In this study, we selected a locus containing 5 CpG dinucleotides to explore the association of *ADD1* gene promoter DNA methylation with EH (Figure 1). We found DNA methylation levels were closely correlated among CpG2-5 (Figure 1,  $r >0.80$ ,  $P <0.001$ ). As shown in Table 1 and Figure S1, our results showed that *ADD1* CpG2-5 methylation levels were significantly associated with EH (cases versus controls (%):  $27.54 \pm 7.48$  versus  $31.44 \pm 5.30$ , adjusted  $P = 0.026$ ). Moreover, significantly higher *ADD1* DNA methylation levels were observed in females than in males (CpG1:  $P = 0.016$ ; CpG2-5:  $P = 0.021$ ). CpG1 methylation was inversely correlated with age in females (Figure 2,  $r = -0.407$ ,  $P = 0.019$ ). *ADD1* methylation levels were significantly higher in pre-menopausal ( $\leq 50$  years) women than post-menopausal ( $>50$  years) women (Figure 3, CpG1:  $P = 0.006$ ; CpG2-5:  $P = 0.034$ ).

A breakdown association test by gender was also performed to explore the association between *ADD1* methylation levels (including CpG1 and CpG2-5) and EH. As shown in Table 2 and Figure S1, *ADD1* CpG1 methylation level was significantly associated with EH in females (cases versus controls (%):  $10.00 \pm 1.41$  versus  $11.36 \pm 3.63$ , adjusted  $P = 0.042$ ) but not in males (adjusted  $P = 0.133$ ). As shown in Table 2 and Figure S1, lower levels of *ADD1* CpG2-5 methylation were associated with increased risk of EH in males (cases versus controls:  $22.48\%$  versus  $31.86\%$ , adjusted  $P = 0.008$ ). In contrast, no association of CpG2-5 methylation levels with EH was found in females (adjusted

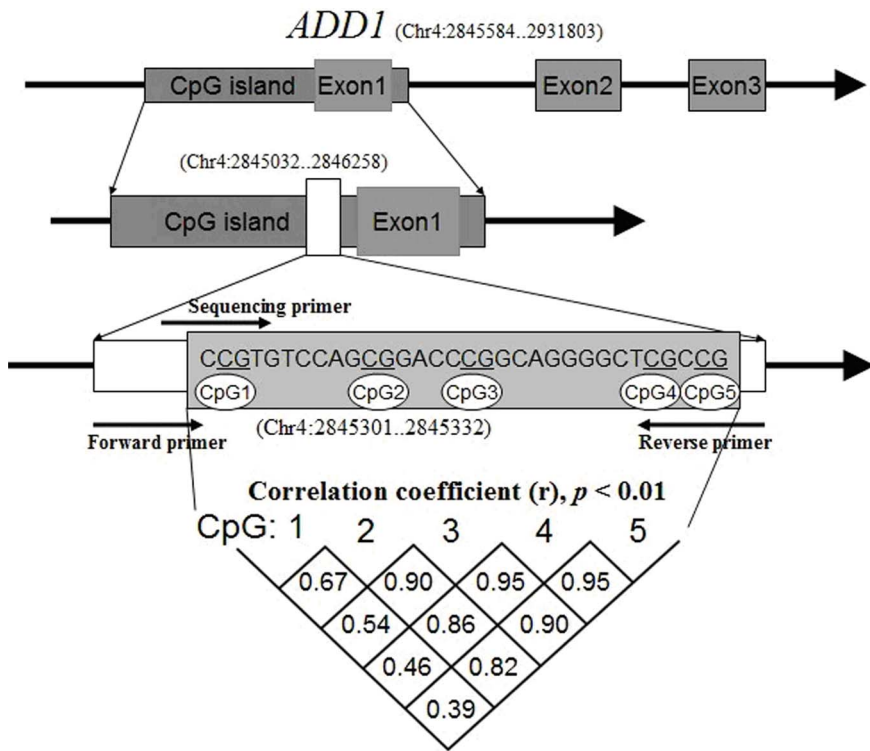

**Figure 1. Correlation among five CpGs in ADD1 gene promoter.**  
doi:10.1371/journal.pone.0063455.g001

$P=0.557$ ). Furthermore, significant interaction of CpG1 methylation and age was found to influence EH status in females (CpG1\*age:  $P=0.029$ ). Prediction potential of EH for ADD1 CpG1 and CpG2-5 methylation levels was assessed by the ROC curves. CpG2-5 methylation was shown as a significant predictor of EH in males [Figure 4a, area under curve (AUC)=0.855,

$P=0.001$ ]. CpG1 methylation was also shown with a trend toward indicator in females (Figure 4b, AUC = 0.699,  $P=0.054$ ).

As shown in Table 1, significant differences were observed between males and females for ALT ( $P=0.001$ ), AST ( $P=0.005$ ) and uric acid ( $P<0.001$ ). Subsequently, we performed correlation tests between ADD1 DNA methylation levels and metabolic

**Table 1. Characteristics of all subjects (n = 61).**

| Characteristics                       | Mean ± s.e.     | Men (Mean ± s.e.) | Women (Mean ± s.e.) | $P_{\text{gender}}$ | EH (Mean ± s.e.) | Non-EH (Mean ± s.e.) | $P_{\text{EH}}$    |
|---------------------------------------|-----------------|-------------------|---------------------|---------------------|------------------|----------------------|--------------------|
| Age (years)                           | 50.2±5.3        | 50.7±5.5          | 49.8±5.1            | 0.527               | 50.8±4.7         | 49.6±5.8             | 0.361              |
| Gender (M/F)                          | 28/33           | NA <sup>c</sup>   | NA <sup>c</sup>     |                     | 14/19            | 14/14                | 0.554              |
| BMI (kg/m <sup>2</sup> ) <sup>a</sup> | 22.50±2.55      | 22.63±1.77        | 22.41±3.01          | 0.781               | 22.95±2.72       | 21.84±2.19           | 0.159              |
| Smoking (Y/N)                         | NA <sup>c</sup> | 9/19              | 0/33                | 0.002               | 5/28             | 3/25                 | 0.896              |
| Drinking (Y/N)                        | NA <sup>c</sup> | 6/22              | 0/33                | 0.018               | 4/29             | 2/26                 | 0.826              |
| Total cholesterol (mmol/L)            | 5.05±0.93       | 5.01±0.85         | 5.08±1.01           | 0.775               | 5.09±0.81        | 4.99±1.07            | 0.681              |
| Total triglycerides (mmol/L)          | 1.50±0.91       | 1.44±0.84         | 1.56±0.97           | 0.615               | 1.69±1.08        | 1.28±0.58            | 0.066              |
| Glucose (mmol/L)                      | 5.18±0.58       | 5.15±0.59         | 5.20±0.58           | 0.735               | 5.31±0.59        | 5.02±0.53            | 0.055              |
| ALT (IU/L)                            | 21.4±15.5       | 28.6±17.9         | 15.3±9.9            | 0.001               | 23.7±13.5        | 18.8±17.5            | 0.228              |
| AST (IU/L) <sup>b</sup>               | 23.9±7.0        | 26.6±7.7          | 21.5±5.4            | 0.005               | 25.3±5.7         | 22.2±8.3             | 0.089              |
| Uric Acid (μmol/L)                    | 298.8±88.8      | 351.5±91.0        | 254.0±57.3          | 0.000               | 312.0±96.4       | 283.2±77.7           | 0.210              |
| CpG1 methylation (%)                  | 9.97±2.24       | 9.25±1.40         | 10.58±2.63          | 0.016               | 9.52±1.46        | 10.50±2.85           | 0.091 <sup>d</sup> |
| CpG2-5 methylation (%)                | 29.33±6.81      | 27.17±7.56        | 31.16±5.58          | 0.021               | 27.54±7.48       | 31.44±5.30           | 0.026 <sup>d</sup> |

<sup>a</sup>n = 44 (18 men versus 26 women, 26 EH versus 18 Non-EH);

<sup>b</sup>n = 59 (28 men versus 31 women, 33 EH versus 26 Non-EH).

<sup>c</sup>NA denotes not applicable.

<sup>d</sup>The p-values were adjusted for age, gender, smoking and drinking using a logistic regression analysis.

doi:10.1371/journal.pone.0063455.t001

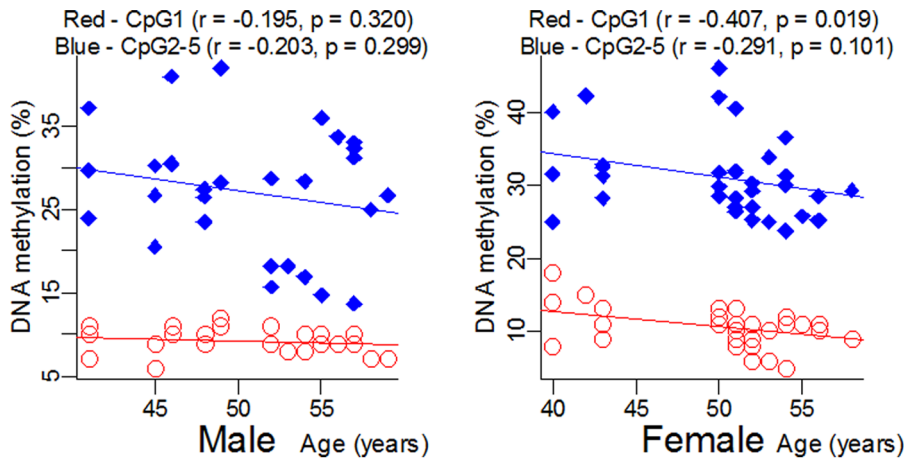

**Figure 2. Pearson correlation between ADD1 methylation and age in males and in females.**  
doi:10.1371/journal.pone.0063455.g002

phenotypes including uric acid, ALT, and AST in controls. However, we didn't find any correlations in controls between ADD1 DNA methylation levels and these metabolic phenotypes ( $P > 0.05$ , Figure S2a–c). A post hoc analysis was performed for the correlation between ADD1 CpG1 and CpG2-5 methylation levels and metabolic phenotypes (uric acid, ALT, and AST) in females and males. Other than a significant correlation between CpG2-5 and AST in females ( $r = -0.644$ ,  $P = 0.024$ , Figure 5), no significant results observed in the rest of correlation tests (Figure S3a–e).

**Discussion**

The goal of the current study is to evaluate the contribution of ADD1 gene promoter DNA methylation to EH. We found that DNA methylation of ADD1 gene was significantly higher in females than in males. In addition, DNA methylation was shown to be a risk factor of EH in males (CpG2-5) and females (CpG1). To our knowledge, this is the first study showing the association of ADD1 gene promoter DNA methylation with EH. Our comprehensive analysis on the role of ADD1 methylation in the risk of EH may provide new hints to clarify the pathogenesis of EH in future.

Adducin was implicated in the pathogenesis of EH by modulating  $\text{Na}^+ \text{K}^+ \text{ATPase}$  activity [46–48]. Evidence indicated

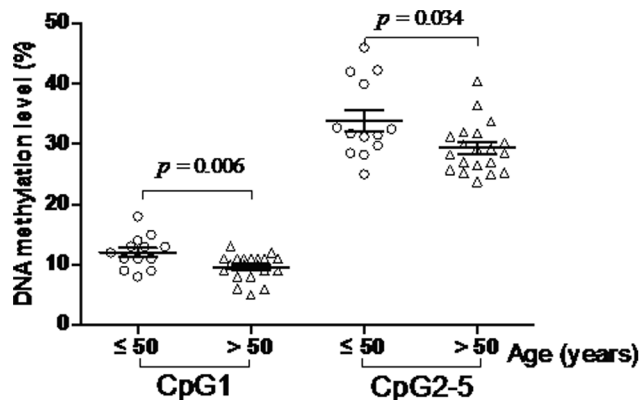

**Figure 3. Significant ADD1 methylation difference between premenopausal and post-menopausal females.**  
doi:10.1371/journal.pone.0063455.g003

**Table 2. Characteristics comparison between EH and Non-EH stratified by gender.**

| Characteristics                       | EH Mean ± s.e. | Non-EH Mean ± s.e. | p value            |
|---------------------------------------|----------------|--------------------|--------------------|
| <b>Men (28)</b>                       |                |                    |                    |
| Age (years)                           | 50.1 ± 4.9     | 51.3 ± 6.3         | 0.595              |
| BMI (kg/m <sup>2</sup> ) <sup>a</sup> | 22.70 ± 2.09   | 22.53 ± 1.41       | 0.846              |
| Smoking (Y/N)                         | 6/8            | 3/11               | 0.420              |
| Drinking (Y/N)                        | 4/10           | 2/12               | 0.648              |
| Total cholesterol (mmol/L)            | 5.09 ± 0.80    | 4.93 ± 0.92        | 0.630              |
| Total triglycerides (mmol/L)          | 1.54 ± 0.98    | 1.34 ± 0.71        | 0.546              |
| Glucose (mmol/L)                      | 5.31 ± 0.60    | 4.99 ± 0.55        | 0.146              |
| ALT(IU/L)                             | 30.4 ± 13.9    | 26.9 ± 21.6        | 0.607              |
| AST(IU/L)                             | 28.0 ± 4.6     | 25.2 ± 9.9         | 0.351              |
| Uric Acid (μmol/L)                    | 375.0 ± 107.3  | 328.1 ± 67.3       | 0.178              |
| CpG1 methylation (%)                  | 8.86 ± 1.29    | 9.64 ± 1.45        | 0.133 <sup>d</sup> |
| CpG2-5 methylation (%)                | 22.48 ± 6.29   | 31.86 ± 5.65       | 0.008 <sup>d</sup> |
| <b>Women (n = 33)</b>                 |                |                    |                    |
| Age (years)                           | 51.3 ± 4.7     | 47.9 ± 5.0         | 0.051              |
| BMI (kg/m <sup>2</sup> ) <sup>b</sup> | 23.11 ± 3.11   | 21.29 ± 2.60       | 0.137              |
| Smoking (Y/N)                         | 0/19           | 0/14               |                    |
| Drinking (Y/N)                        | 0/19           | 0/14               |                    |
| Total cholesterol (mmol/L)            | 5.09 ± 0.85    | 5.06 ± 1.23        | 0.914              |
| Total triglycerides (mmol/L)          | 1.81 ± 1.17    | 1.22 ± 0.44        | 0.058              |
| Glucose (mmol/L)                      | 5.31 ± 0.60    | 5.06 ± 0.54        | 0.235              |
| ALT (IU/L)                            | 18.7 ± 11.2    | 10.8 ± 5.2         | 0.012              |
| AST (IU/L) <sup>c</sup>               | 23.4 ± 5.6     | 18.7 ± 3.6         | 0.008              |
| Uric Acid (μmol/L)                    | 265.6 ± 53.4   | 238.2 ± 60.6       | 0.180              |
| CpG1 methylation (%)                  | 10.00 ± 1.41   | 11.36 ± 3.63       | 0.042 <sup>e</sup> |
| CpG2-5 methylation (%)                | 31.26 ± 6.04   | 31.02 ± 5.11       | 0.557 <sup>e</sup> |

<sup>a</sup>n = 18 (10 EH versus 8 Non-EH);

<sup>b</sup>n = 26 (16 EH versus 10 Non-EH);

<sup>c</sup>n = 31 (19 EH versus 12 Non-EH);

<sup>d</sup>The p-values were adjusted for age, smoking and drinking using logistic-regression analysis.

<sup>e</sup>The p-values were adjusted for age, smoking, drinking, ALT and AST using logistic-regression analysis.

doi:10.1371/journal.pone.0063455.t002

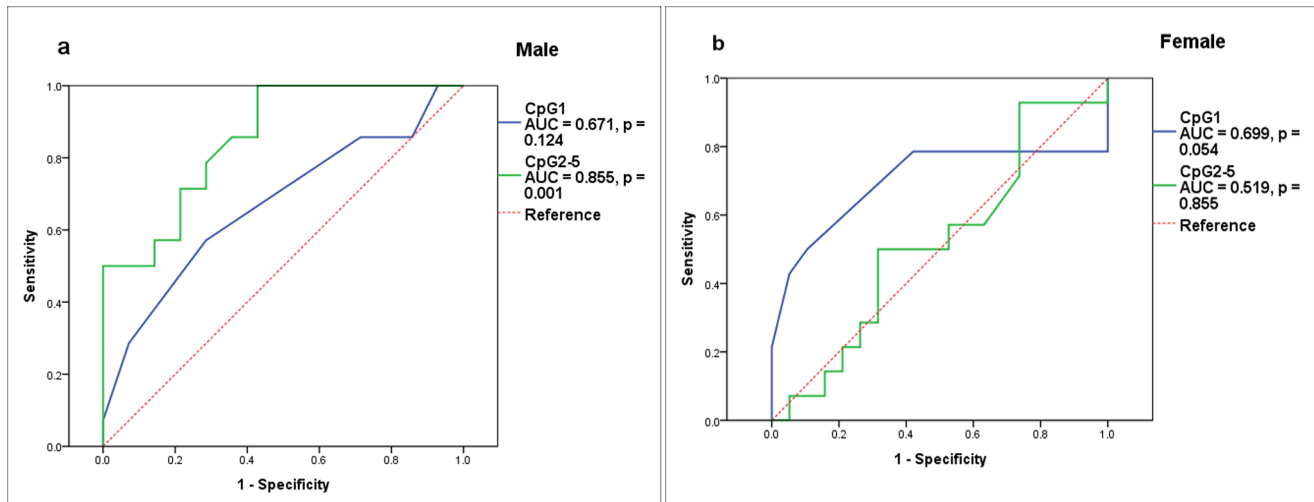

**Figure 4. ROC Curve of *ADD1* promoter DNA methylation in EH (a, b).**  
doi:10.1371/journal.pone.0063455.g004

that adducin might be a candidate protein to explain genetic alterations in ion transport associated with EH [47]. A previous study reported that hypertensive rat had an increased activity and expression of  $\text{Na}^+\text{-K}^+$ -pump [48]. In this study, we hypothesized that the aberrant *ADD1* methylation may cause hypertension. We speculated that lower *ADD1* methylation led to higher expression of  $\alpha$ -adducin which resulted in an increased activity and expression of  $\text{Na}^+\text{-K}^+$ -pump and eventually caused high  $\text{Na}^+$ -reabsorption and hypertension. In accordance with the speculation, we did observe a significant lower level of *ADD1* gene promoter methylation in EH cases than in controls.

Interestingly, CpG1 methylation was associated with EH in females, while the CpG2-5 methylation was significantly associated with EH in males. We also found *ADD1* methylation was significantly higher in females than in males. In the present study,

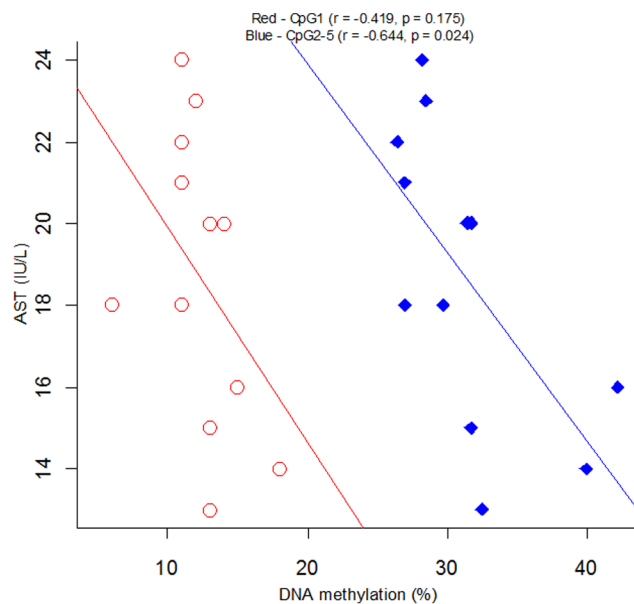

**Figure 5. Pearson correlation between *ADD1* methylation and AST in females.**  
doi:10.1371/journal.pone.0063455.g005

all subjects were recruited from Han Chinese residents in Ningbo city for at least three generations and diagnosed by generally recognized protocol. The gender and age were well matched between EH cases and Non-EH controls. The power of our association test of EH was 86.5% for *ADD1* CpG2-5 in all samples, 66.7% for *ADD1* CpG1 in females, and 84.4% for *ADD1* CpG2-5 in males. Additionally the power of the analysis stratified by menopausal status was 71% for *ADD1* CpG1 and 61.7% for *ADD1* CpG2-5. However, our study was only involved with 61 samples and we could not exclude a possibility of spurious association due to the hidden structures in the tested samples. Future replication study with larger size of samples is warranted to confirm our findings.

Sexual dimorphism was found in the whole genome analysis for the risk loci of hypertension in rats [49,50] and humans [51]. Gender dimorphism was also observed in the association studies of hypertension. These studies addressed *ADD1* Gly460Trp polymorphism in female Caucasians [29], *CYP19A1* polymorphisms (rs700518, rs10046 and rs4646) in male Japanese [52], *SELE* T1559C polymorphism [53] and *PNMT* G390A polymorphism [54] in male Chinese, and other *P2RY2* polymorphism (rs4944831) [55]. In the current study, we found that ALT and AST were associated with EH only in females, and that *ADD1* CpG1 and CpG2-5 methylation levels were associated with EH in females and males, respectively. Moreover, CpG2-5 was correlated with AST in females, but not in males. These results may be associated with the difference of sex hormones. The role for gender (and/or sex hormones) has been described in mediating differential epigenetic effects on cardiomyocytes [56], effects of radiation [57,58] and the endocrine system [59]. Significant higher *ADD1* methylation levels were found in pre-menopausal women than in post-menopausal ones. Our results provide new clues to explain the sexual dimorphism of EH.

DNA methylation level in humans is reported to alter along with changes of environmental factors such as nutrients [60] and drugs [61,62]. Therefore, major risk factors for hypertension including physical inactivity, high sodium diet, alcohol consumption and obesity [4,5] may alter the DNA methylation levels of EH risk genes and cause EH over time. Since lifestyle factors such as smoking, drinking, and physical activity are different between males and females, our findings of gender-dependent *ADD1*

methylation may reflect the difference in these non-heritable risk factors of EH.

Uric acid was reported positively correlated to the incidence of EH [63]. Previous study also showed uric acid was the risk factor associated with the mortality in hypertensive stroke patients [64]. In addition, uric acid has been reported associated with the prevalence of chronic kidney disease [65]. Raised plasma ALT level was associated with hypertension in Hong Kong Chinese [66]. Another study also reported that elevated ALT and (or) AST were associated with increased risk of pulmonary arterial hypertension [67]. However, ALT and AST have mostly been reported to be associated with hepatic disease [68–70], and they were seldom reported to be related with EH. In the current study, we didn't find the associations of uric acid and ALT with *ADD1* DNA methylation levels in controls, whereas CpG2-5 was associated with AST in females. Future study is needed to investigate the mechanism underlining this association.

In summary, this study presents a lower *ADD1* promoter methylation increases EH risk. *ADD1* CpG2-5 methylation is able to predict EH risk in males with higher fidelity than CpG1 methylation does in females. The loss of power for CpG1 may be due to a significant interaction between CpG1 and age in females. Our findings are likely to bring new hints to elaborate the pathogenesis of this complex disease.

## References

- He J, Bazzano LA, Chen CS, Chen J, Rao DC, et al. (2007) GenSalt: rationale, design, methods and baseline characteristics of study participants. *J Hum Hypertens* 21: 639–646.
- Svetkey LP, Harris EL, Martin E, Vollmer WM, Meltesen GT, et al. (2011) Modulation of the BP response to diet by genes in the renin-angiotensin system and the adrenergic nervous system. *Am J Hypertens* 24: 209–217.
- Kurtz TW, Spence MA (1993) Genetics of essential hypertension. *Am J Med* 94: 77–84.
- Binder A (2007) A review of the genetics of essential hypertension. *Curr Opin Cardiol* 22: 176–184.
- Whelton PK, He J, Appel LJ, Cutler JA, Havas S, et al. (2002) Primary prevention of hypertension: clinical and public health advisory from The National High Blood Pressure Education Program. *JAMA* 288: 1882–1888.
- Zhang X, Giovannucci EL, Wu K, Smith-Warner SA, Fuchs CS, et al. (2012) Magnesium intake, plasma C-peptide, and colorectal cancer incidence in US women: a 28-year follow-up study. *Br J Cancer* 106: 1335–1341.
- Tohidi M, Hatami M, Hadaegh F, Azizi F (2012) Triglycerides and triglycerides to high-density lipoprotein cholesterol ratio are strong predictors of incident hypertension in Middle Eastern women. *J Hum Hypertens* 26: 525–532.
- Gilbert JS, Nijland MJ (2008) Sex differences in the developmental origins of hypertension and cardiorenal disease. *Am J Physiol Regul Integr Comp Physiol* 295: R1941–1952.
- Fisher ND, Ferri C, Bellini C, Santucci A, Gleason R, et al. (1997) Age, gender, and non-modulation. A sexual dimorphism in essential hypertension. *Hypertension* 29: 980–985.
- Dzudie A, Kengne AP, Muna WF, Ba H, Menanga A, et al. (2012) Prevalence, awareness, treatment and control of hypertension in a self-selected sub-Saharan African urban population: a cross-sectional study. *BMJ Open* 2.
- Coatmellec-Tagliani G, Dausse JP, Giudicelli Y, Ribiere C (2002) Gender difference in diet-induced obesity hypertension: implication of renal alpha2-adrenergic receptors. *Am J Hypertens* 15: 143–149.
- Silva-Antonioli MM, Tostes RC, Fernandes L, Fior-Chadi DR, Akamine EH, et al. (2004) A lower ratio of AT1/AT2 receptors of angiotensin II is found in female than in male spontaneously hypertensive rats. *Cardiovasc Res* 62: 587–593.
- Danser AH, Derx FH, Schalekamp MA, Hense HW, Riegger GA, et al. (1998) Determinants of interindividual variation of renin and prorenin concentrations: evidence for a sexual dimorphism of (pro)renin levels in humans. *J Hypertens* 16: 853–862.
- Bachmann J, Feldmer M, Ganten U, Stock G, Ganten D (1991) Sexual dimorphism of blood pressure: possible role of the renin-angiotensin system. *J Steroid Biochem Mol Biol* 40: 511–515.
- Rands VF, Seth DM, Kobori H, Prieto MC (2012) Sexual dimorphism in urinary angiotensinogen excretion during chronic angiotensin II-salt hypertension. *Genet Med* 9: 207–218.
- Rinn JL, Snyder M (2005) Sexual dimorphism in mammalian gene expression. *Trends Genet* 21: 298–305.
- Matsuoka Y, Li X, Bennett V (2000) Adducin: structure, function and regulation. *Cell Mol Life Sci* 57: 884–895.

## Supporting Information

**Figure S1 Subgroup analysis in *ADD1* promoter DNA methylation<sup>a</sup>.** a: Triangles and circles stand for males and females respectively; blue and red stand for cases and controls, respectively.  
(TIF)

**Figure S2 Pearson correlation between *ADD1* methylation and metabolic phenotypes in controls (A–C).**  
(TIF)

**Figure S3 Pearson correlation between *ADD1* methylation and metabolic phenotypes in males (A–C) and in females (D–F).**  
(TIF)

**Table S1 Primers for *ADD1* gene CpG island loci analysis.**  
(DOC)

## Author Contributions

Conceived and designed the experiments: LZ SD MY. Performed the experiments: PL FY. Analyzed the data: PL SD. Contributed reagents/materials/analysis tools: LW Leiting Xu YX LF QZ LH XQ YH Limin Xu YL. Wrote the paper: PL SD LZ. Proofread the manuscript: PL SD.

- Tripodi G, Valtorta F, Torielli L, Chiercagatti E, Salardi S, et al. (1996) Hypertension-associated point mutations in the adducin alpha and beta subunits affect actin cytoskeleton and ion transport. *J Clin Invest* 97: 2815–2822.
- Casari G, Barlassina C, Cusi D, Zagato L, Muirhead R, et al. (1995) Association of the alpha-adducin locus with essential hypertension. *Hypertension* 25: 320–326.
- Manunta P, Cusi D, Barlassina C, Righetti M, Lanzani C, et al. (1998) Alpha-adducin polymorphisms and renal sodium handling in essential hypertensive patients. *Kidney Int* 53: 1471–1478.
- Iwai N, Tamaki S, Nakamura Y, Kinoshita M (1997) Polymorphism of alpha-adducin and hypertension. *Lancet* 350: 369.
- Kamitani A, Wong ZY, Fraser R, Davies DL, Connor JM, et al. (1998) Human alpha-adducin gene, blood pressure, and sodium metabolism. *Hypertension* 32: 138–143.
- Busch CP, Harris SB, Hanley AJ, Zinman B, Hegele RA (1999) The ADD1 G460W polymorphism is not associated with variation in blood pressure in Canadian Oji-Cree. *J Hum Genet* 44: 225–229.
- Ramu P, Umamaheswaran G, Shewade DG, Swaminathan RP, Balachander J, et al. (2010) Gly460Trp polymorphism of the ADD1 gene and essential hypertension in an Indian population: A meta-analysis on hypertension risk. *Indian J Hum Genet* 16: 8–15.
- Liu K, Liu J, Huang Y, Liu Y, Lou Y, et al. (2010) Alpha-adducin Gly460Trp polymorphism and hypertension risk: a meta-analysis of 22 studies including 14303 cases and 15961 controls. *PLoS One* 5.
- Niu W, Qi Y (2011) Association of alpha-adducin and G-protein beta3 genetic polymorphisms with hypertension: a meta-analysis of Chinese populations. *PLoS One* 6: e17052.
- Liu K, Liu Y, Liu J, Wang Z, Lou Y, et al. (2011) alpha-adducin Gly460Trp polymorphism and essential hypertension risk in Chinese: a meta-analysis. *Hypertens Res* 34: 389–399.
- Li YY (2012) alpha-Adducin Gly460Trp gene mutation and essential hypertension in a Chinese population: a meta-analysis including 10,960 subjects. *PLoS One* 7: e30214.
- Wang JG, Staessen JA, Barlassina C, Fagard R, Kuznetsova T, et al. (2002) Association between hypertension and variation in the alpha- and beta-adducin genes in a white population. *Kidney Int* 62: 2152–2159.
- Razin A, Webb C, Szyf M, Yisraeli J, Rosenthal A, et al. (1984) Variations in DNA methylation during mouse cell differentiation in vivo and in vitro. *Proc Natl Acad Sci U S A* 81: 2275–2279.
- Morita S, Takahashi RU, Yamashita R, Toyoda A, Horii T, et al. (2012) Genome-Wide Analysis of DNA Methylation and Expression of MicroRNAs in Breast Cancer Cells. *Int J Mol Sci* 13: 8259–8272.
- Grutzmann R, Molnar B, Pilarsky C, Habermann JK, Schlag PM, et al. (2008) Sensitive detection of colorectal cancer in peripheral blood by septin 9 DNA methylation assay. *PLoS One* 3: e3759.
- DeVos T, Tetzner R, Model F, Weiss G, Schuster M, et al. (2009) Circulating methylated SEPT9 DNA in plasma is a biomarker for colorectal cancer. *Clin Chem* 55: 1337–1346.

34. Muller HM, Fiegl H, Widschwendter A, Widschwendter M (2004) Prognostic DNA methylation marker in serum of cancer patients. *Ann NY Acad Sci* 1022: 44–49.
35. Muller HM, Widschwendter A, Fiegl H, Ivarsson L, Goebel G, et al. (2003) DNA methylation in serum of breast cancer patients: an independent prognostic marker. *Cancer Res* 63: 7641–7645.
36. Guay SP, Brisson D, Munger J, Lamarche B, Gaudet D, et al. (2012) ABCA1 gene promoter DNA methylation is associated with HDL particle profile and coronary artery disease in familial hypercholesterolemia. *Epigenetics* 7: 464–472.
37. Xu H, Wang B, Su D, Yu Q, Li Q, et al. (2012) The DNA methylation profile of PLA2G4C gene promoter in schizophrenia. *Psychiatry Res.*
38. Kinoshita M, Numata S, Tajima A, Shimodera S, Ono S, et al. (2012) DNA Methylation Signatures of Peripheral Leukocytes in Schizophrenia. *Neuromolecular Med.*
39. Smolarek I, Wyszko E, Barciszewska AM, Nowak S, Gawronska I, et al. (2010) Global DNA methylation changes in blood of patients with essential hypertension. *Med Sci Monit* 16: CR149–155.
40. Kulkarni A, Chavan-Gautam P, Mehendale S, Yadav H, Joshi S (2011) Global DNA methylation patterns in placenta and its association with maternal hypertension in pre-eclampsia. *DNA Cell Biol* 30: 79–84.
41. Friso S, Pizzolo F, Choi SW, Guarini P, Castagna A, et al. (2008) Epigenetic control of 11 beta-hydroxysteroid dehydrogenase 2 gene promoter is related to human hypertension. *Atherosclerosis* 199: 323–327.
42. Jiang Q, Yuan H, Xing X, Liu J, Huang Z, et al. (2011) Methylation of adrenergic beta1 receptor is a potential epigenetic mechanism controlling antihypertensive response to metoprolol. *Indian J Biochem Biophys* 48: 301–307.
43. (2003) 2003 European Society of Hypertension-European Society of Cardiology guidelines for the management of arterial hypertension. *J Hypertens* 21: 1011–1053.
44. Perloff D, Grim C, Flack J, Frohlich ED, Hill M, et al. (1993) Human blood pressure determination by sphygmomanometry. *Circulation* 88: 2460–2470.
45. Dupont WD, Plummer WD, Jr. (1990) Power and sample size calculations. A review and computer program. *Control Clin Trials* 11: 116–128.
46. Ferrandi M, Salardi S, Tripodi G, Barassi P, Rivera R, et al. (1999) Evidence for an interaction between adducin and Na(+)-K(+)-ATPase: relation to genetic hypertension. *Am J Physiol* 277: H1338–1349.
47. Bianchi G, Tripodi G, Casari G, Salardi S, Barber BR, et al. (1994) Two point mutations within the adducin genes are involved in blood pressure variation. *Proc Natl Acad Sci U S A* 91: 3999–4003.
48. Ferrandi M, Tripodi G, Salardi S, Florio M, Modica R, et al. (1996) Renal Na,K-ATPase in genetic hypertension. *Hypertension* 28: 1018–1025.
49. Deng AY, Menard A, Xiao C, Roy J (2008) Sexual dimorphism on hypertension of quantitative trait loci entrapped in Dahl congenic rats. *Clin Exp Hypertens* 30: 511–519.
50. Yagil C, Sapojnikov M, Kreutz R, Katni G, Lindpaintner K, et al. (1998) Salt susceptibility maps to chromosomes 1 and 17 with sex specificity in the Sabra rat model of hypertension. *Hypertension* 31: 119–124.
51. Seda O, Tremblay J, Gaudet D, Brunelle PL, Gurau A, et al. (2008) Systematic, genome-wide, sex-specific linkage of cardiovascular traits in French Canadians. *Hypertension* 51: 1156–1162.
52. Shimodaira M, Nakayama T, Sato N, Saito K, Morita A, et al. (2008) Association study of aromatase gene (CYP19A1) in essential hypertension. *Int J Med Sci* 5: 29–35.
53. Wang ZG, Niu QL, Gu W, Liu K, Lou YQ, et al. (2011) [Association of C602A and T1559C polymorphisms of E-selectin gene and essential hypertension]. *Zhonghua Yi Xue Za Zhi* 91: 1238–1241.
54. Chen A, Chen X, Shi R, Guo Y, Chen L, et al. (2009) [Association of genetic polymorphism in phenylethanolamine-N-methyl transferase with essential hypertension in Changsha Han people]. *Zhong Nan Da Xue Xue Bao Yi Xue Ban* 34: 1120–1125.
55. Wang Z, Nakayama T, Sato N, Izumi Y, Kasamaki Y, et al. (2010) The purinergic receptor P2Y<sub>2</sub>, G-protein coupled, 2 (P2RY2) gene associated with essential hypertension in Japanese men. *J Hum Hypertens* 24: 327–335.
56. Sebag IA, Gillis MA, Calderone A, Kasnci A, Meilleur M, et al. (2011) Sex hormone control of left ventricular structure/function: mechanistic insights using echocardiography, expression, and DNA methylation analyses in adult mice. *Am J Physiol Heart Circ Physiol* 301: H1706–1715.
57. Raiche J, Rodriguez-Juarez R, Pogribny I, Kovalchuk O (2004) Sex- and tissue-specific expression of maintenance and de novo DNA methyltransferases upon low dose X-irradiation in mice. *Biochem Biophys Res Commun* 325: 39–47.
58. Koturbash I, Kutanzi K, Hendrickson K, Rodriguez-Juarez R, Kogosov D, et al. (2008) Radiation-induced bystander effects in vivo are sex specific. *Mutat Res* 642: 28–36.
59. Zhang X, Ho SM (2011) Epigenetics meets endocrinology. *J Mol Endocrinol* 46: R11–32.
60. Reynolds E (2006) Vitamin B12, folic acid, and the nervous system. *Lancet Neurol* 5: 949–960.
61. Dong E, Nelson M, Grayson DR, Costa E, Guidotti A (2008) Clozapine and sulpiride but not haloperidol or olanzapine activate brain DNA demethylation. *Proc Natl Acad Sci U S A* 105: 13614–13619.
62. Melas PA, Rogdaki M, Osby U, Schalling M, Lavebratt C, et al. (2012) Epigenetic aberrations in leukocytes of patients with schizophrenia: association of global DNA methylation with antipsychotic drug treatment and disease onset. *FASEB J* 26: 2712–2718.
63. Chen DL, Zhang CJ, Fu YH, Mo YJ, Chen FR (2010) [Correlation of angiotensin-converting enzyme 2 gene polymorphisms to essential hypertension and ischemic stroke]. *Nan Fang Yi Ke Da Xue Xue Bao* 30: 1890–1892, 1895.
64. Mo YJ, Huang WH, Chen DL, Chen FR (2010) [Relationship of angiotensin-converting enzyme 2 gene polymorphism with the prognosis of hypertensive stroke patients]. *Nan Fang Yi Ke Da Xue Xue Bao* 30: 84–87.
65. Jalal DI, Chonchol M, Chen W, Targher G (2012) Uric Acid as a Target of Therapy in CKD. *Am J Kidney Dis.*
66. Cheung BM, Ong KL, Tso AW, Cherny SS, Sham PC, et al. (2011) Gamma-glutamyl transferase level predicts the development of hypertension in Hong Kong Chinese. *Clin Chim Acta* 412: 1326–1331.
67. Benza RL, Barst RJ, Galie N, Frost A, Girgis RE, et al. (2008) Sitaxsentan for the treatment of pulmonary arterial hypertension: a 1-year, prospective, open-label observation of outcome and survival. *Chest* 134: 775–782.
68. Razavizade M, Jamali R, Arj A, Talari H (2012) Serum parameters predict the severity of ultrasonographic findings in non-alcoholic fatty liver disease. *Hepatobiliary Pancreat Dis Int* 11: 513–520.
69. Ma L, Xie C, Ran Y, Liang X, Huang L, et al. (2012) Synthesis, and Biological Evaluation of 5-Benzylidenepyrimidine-2,4,6-(1H,3H,5H)-trione Derivatives for the Treatment of Obesity-related Nonalcoholic Fatty Liver Disease. *J Med Chem.*
70. Ikai E, Ishizaki M, Suzuki Y, Ishida M, Noborizaka Y, et al. (1995) Association between hepatic steatosis, insulin resistance and hyperinsulinaemia as related to hypertension in alcohol consumers and obese people. *J Hum Hypertens* 9: 101–105.
